# Supplementary material
Source: HighWire-hosted journal article supplement (https://drc.bmj.com/content/11/4/e003376)
Supplement: inline-supplementary-material-1 [file inline-supplementary-material-1.pdf]

## Supplementary Material

**Supporting Figure 1:** RetinaVue 100 device (A), RETeval device featuring a grey Ganzfeld dome (B)

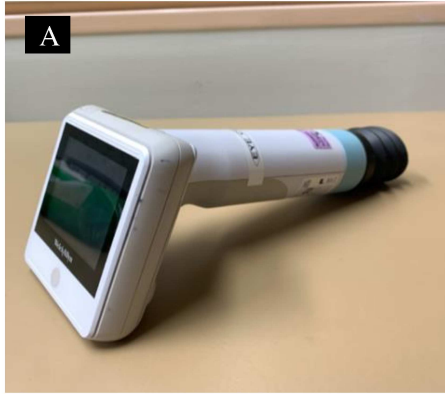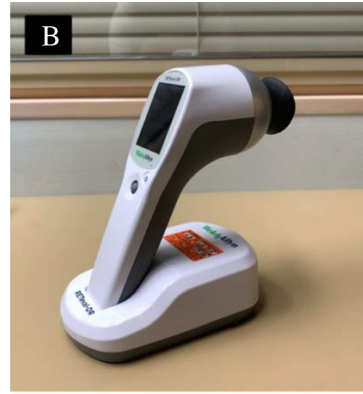

**Supporting Figure 2: Non-Mydriatic vs Mydriatic Photographs (Case 1)**

Non-mydriatic macula (A) and optic-disc (B) centred photographs, which are inadequate for diagnostic purposes vs. Mydriatic macula (C) and optic-disc (D) centred images of the same patient, revealing severe NPDR with hard exudates approaching the fovea

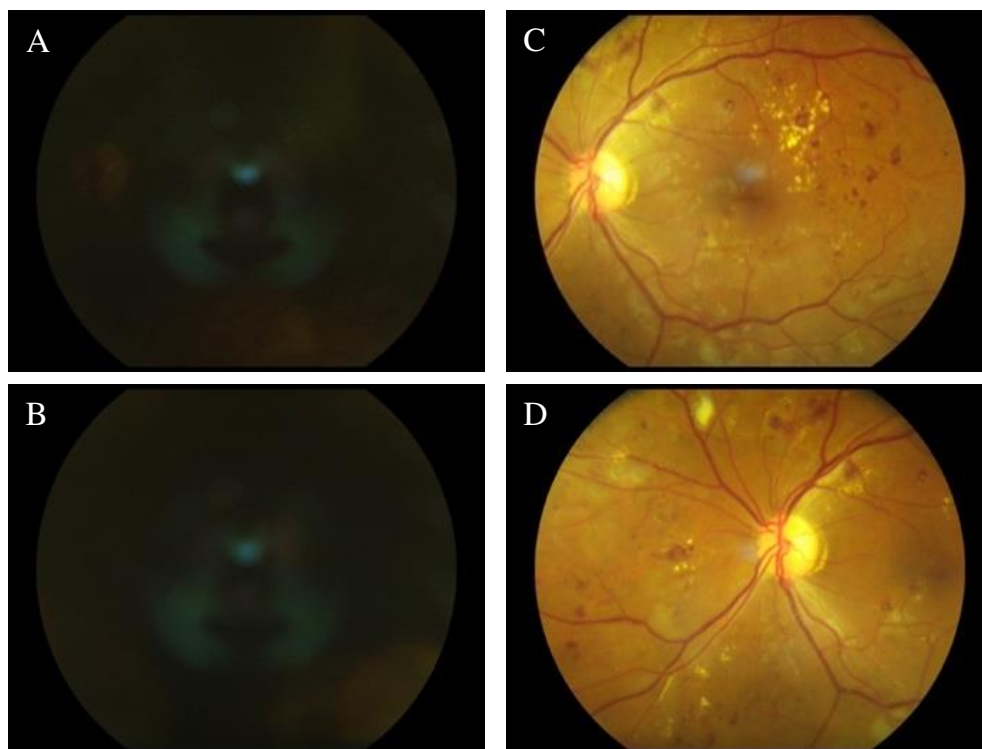

**Supporting Figure 3: Non-Mydriatic vs Mydriatic Photographs (Case 2)**

Non-mydriatic macula (A) and optic-disc (B) centred photographs, graded as Mild DR vs. Mydriatic macula (C) and optic-disc (D) centred images of the same patient, revealing severe NPDR

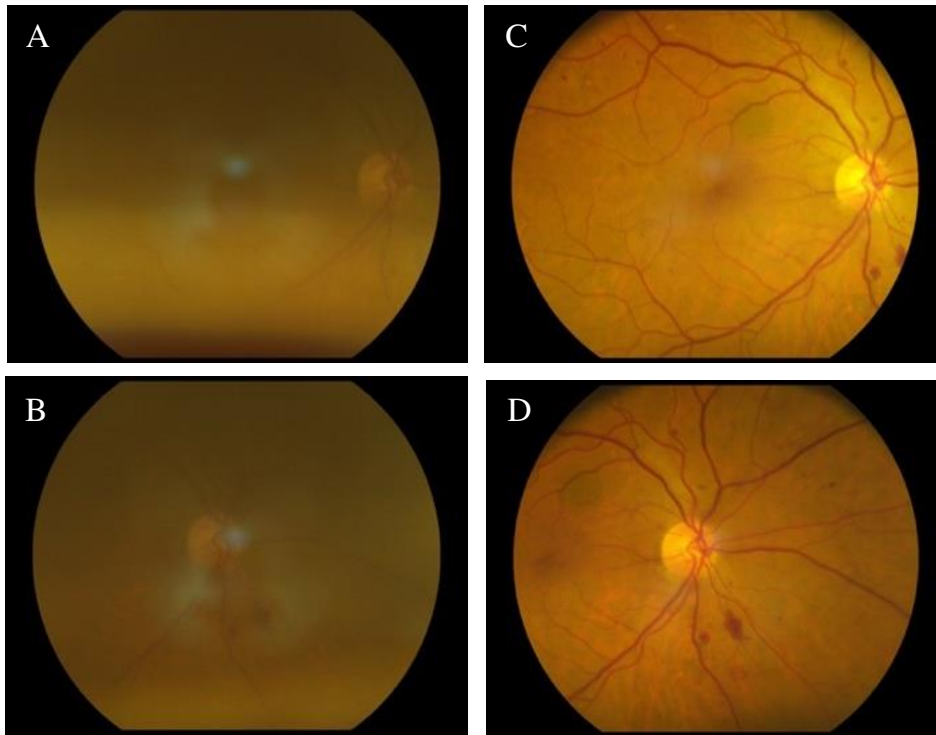

**Supporting Table 1:** Sensitivity and specificity results for VTDR, NPDR and Any DR

| Criteria | Group       | Rate (LCL, UCL)    |
|----------|-------------|--------------------|
| VTDR     | Sensitivity | 13.7 (8.4, 20.5)   |
|          | Specificity | 99.7 (99.0, 100.0) |
|          | Accuracy    | 86.2 (83.8, 88.4)  |
| NPDR     | Sensitivity | 21.7 (16.0, 28.4)  |
|          | Specificity | 99.9 (99.3, 100.0) |
|          | Accuracy    | 84.4 (81.9, 86.7)  |
| Any DR   | Sensitivity | 20.2 (16.1, 25.0)  |
|          | Specificity | 99.5 (98.7, 99.9)  |
|          | Accuracy    | 75.9 (73.2, 78.4)  |
